# Supplementary material for: Dengue Virus Induced COX-2 Signaling Is Regulated Through Nutrient Sensor GCN2
Source: PubMed Central journal article supplement (PMC7438581; doi:10.3389/fimmu.2020.01831), 2020-08-13
Supplement: Data_Sheet_1.pdf [file Data_Sheet_1.pdf]

## Supplementary Information

### **Dengue virus induced COX-2 signaling is regulated through nutrient sensor GCN2**

Sumbul Afroz<sup>1</sup>, Srikanth Battu<sup>1,2</sup>, Jeevan Giddaluru<sup>1</sup> and Nooruddin Khan<sup>1,3\*</sup>

<sup>1</sup>Department of Biotechnology and Bioinformatics, School of Life-Sciences, University of Hyderabad, Hyderabad-500046, Telangana, India.

<sup>2</sup>Laboratory of Molecular Cell Biology, Centre for DNA Fingerprinting and Diagnostics (CDFD), Inner Ring Road, Uppal, Hyderabad-500039, Telangana, India.

<sup>3</sup>Department of Animal Biology, School of Life-Sciences, University of Hyderabad, Hyderabad-500046, Telangana, India.

\*Correspondence should be addressed to: Nooruddin Khan

Dr. Nooruddin Khan  
Associate Professor,  
Department of Animal Biology,  
University of Hyderabad.  
Hyderabad-500046, Telangana, India.  
([noor@uohyd.ac.in](mailto:noor@uohyd.ac.in)).

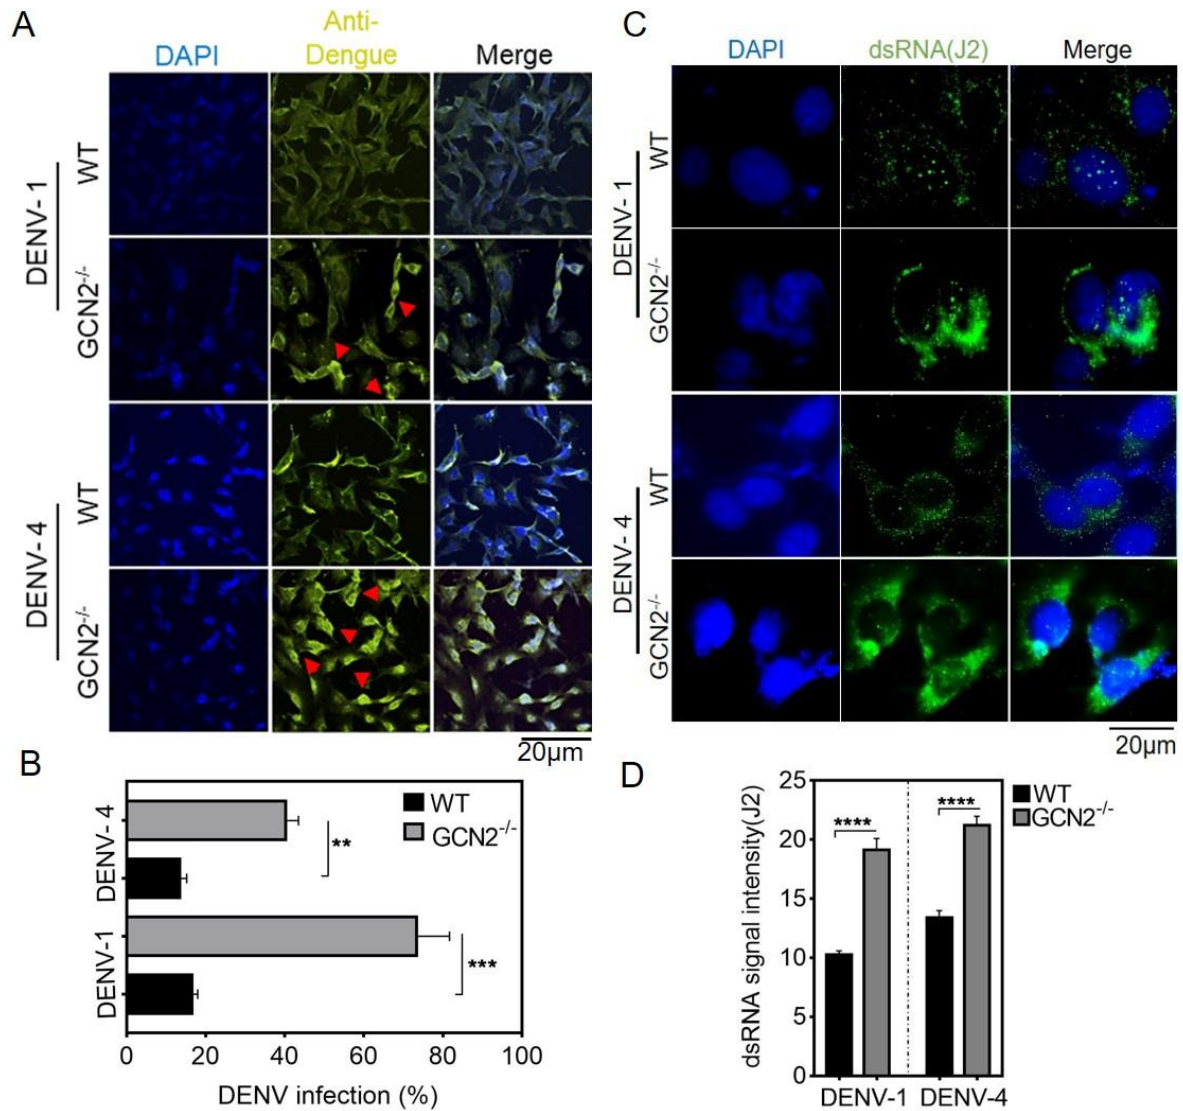

**Figure S1. GCN2 deficient cells are highly susceptible to infection with other DENV serotypes.** (A-B) WT and GCN2<sup>-/-</sup> MEFs were mock infected or infected with DENV-1 and DENV-4 (moi 3) for 36h for analysis of DENV pathogenesis. The cells were immunostained with Anti-Dengue (green) antibody to stain infected cells. (A) Confocal microscopy image showing the number of DENV-1 and DENV-4 positive cells. (B) Quantification of percentage of DENV-1 and DENV-4 infection in WT and GCN2<sup>-/-</sup> MEFs in ten different fields using Image J (NIH) software. (C) Analysis of dsRNA accumulation in DENV-1 and DENV-4 (moi 3) infected WT and GCN2<sup>-/-</sup> MEFs at 36hpi by immunofluorescence. J2 antibody was used to detect DENV dsRNA intermediate. Alexa-Fluor 488 conjugated secondary antibody was used to detect primary antibody respectively. (D) Quantification of dsRNA (J2 signal intensity) using Image J software. Data is mean  $\pm$  SEM of three independent set of experiments. \* $P < 0.05$ , \*\* $P < 0.0$ , \*\*\* $P < 0.001$ , \*\*\*\* $P < 0.0001$  was considered significant. Statistical analysis was done using two-tailed unpaired Student's *t* test.

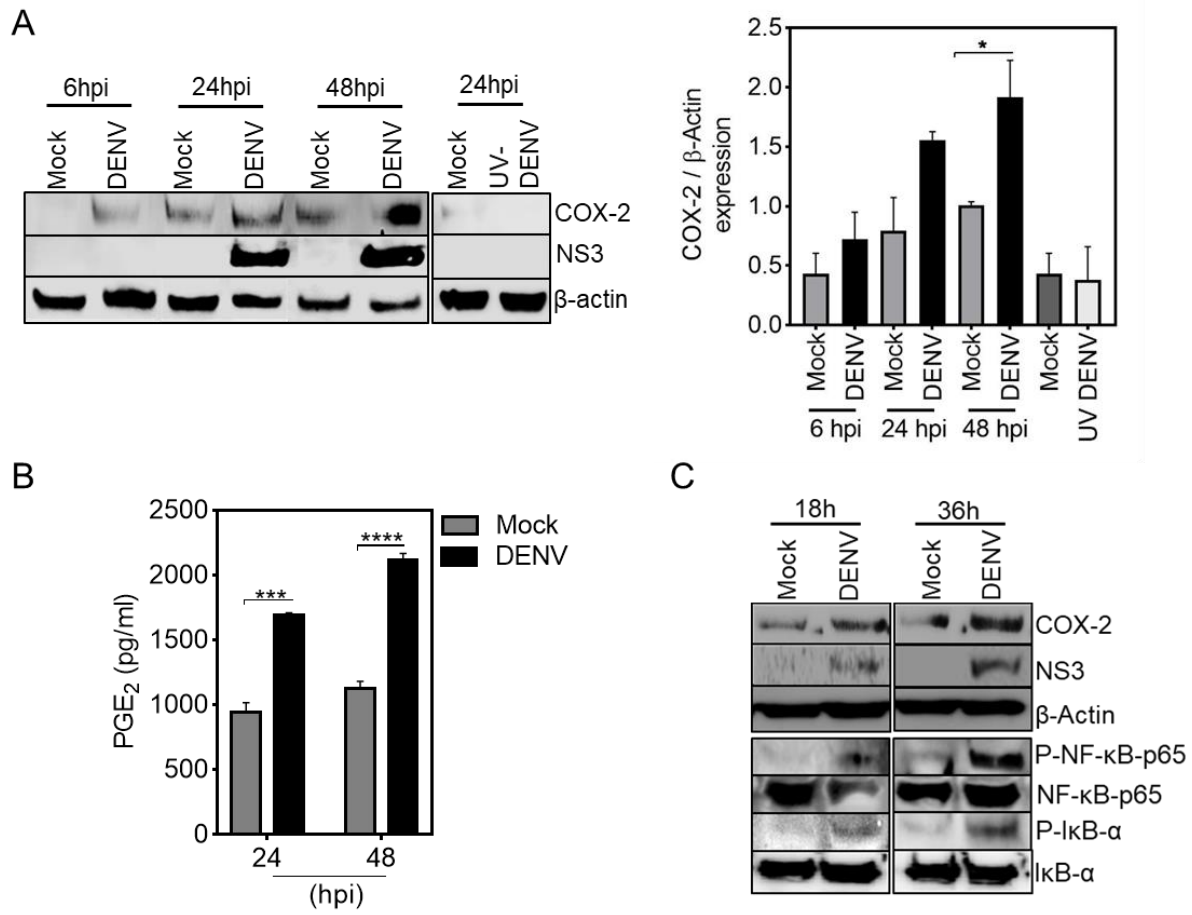

**Figure S2. DENV enhances COX-2 expression.** (A-B) HepG2 cells were mock infected or DENV-2 (moi 3) infected or infected with equal moi of UV treated DENV-2. Cell lysates were prepared or supernatants were collected at indicated time points. (A) Immunoblot analysis of COX-2 expression in cell lysates (left). Densitometry analysis of immunoblot showing COX-2 expression levels. The expression of COX-2 protein was normalized to  $\beta$ -actin using Image J software (right). Graph is representative of mean  $\pm$  SEM of three independent experiments (B) PGE<sub>2</sub> level was estimated in culture supernatants by ELISA. Graph represents data as mean  $\pm$  SEM from two independent experiments performed in triplicates. \*P<0.05, \*\*\*P<0.001, \*\*\*\*P<0.0001 was considered as statistically significant. Statistical significance was calculated by two-tailed unpaired Student's t-test (A) and 2-way ANOVA (B). (C) Primary human monocytes were mock infected or infected with DENV-2 at moi=3 and expression of COX-2, P-NF- $\kappa$ B-p65, NF- $\kappa$ B-p65, P-I $\kappa$ B- $\alpha$  and I $\kappa$ B- $\alpha$  was checked at the indicated time points. Immunoblot analysis of the expression levels of above mentioned proteins in cell lysates.  $\beta$ -actin was used as loading control.

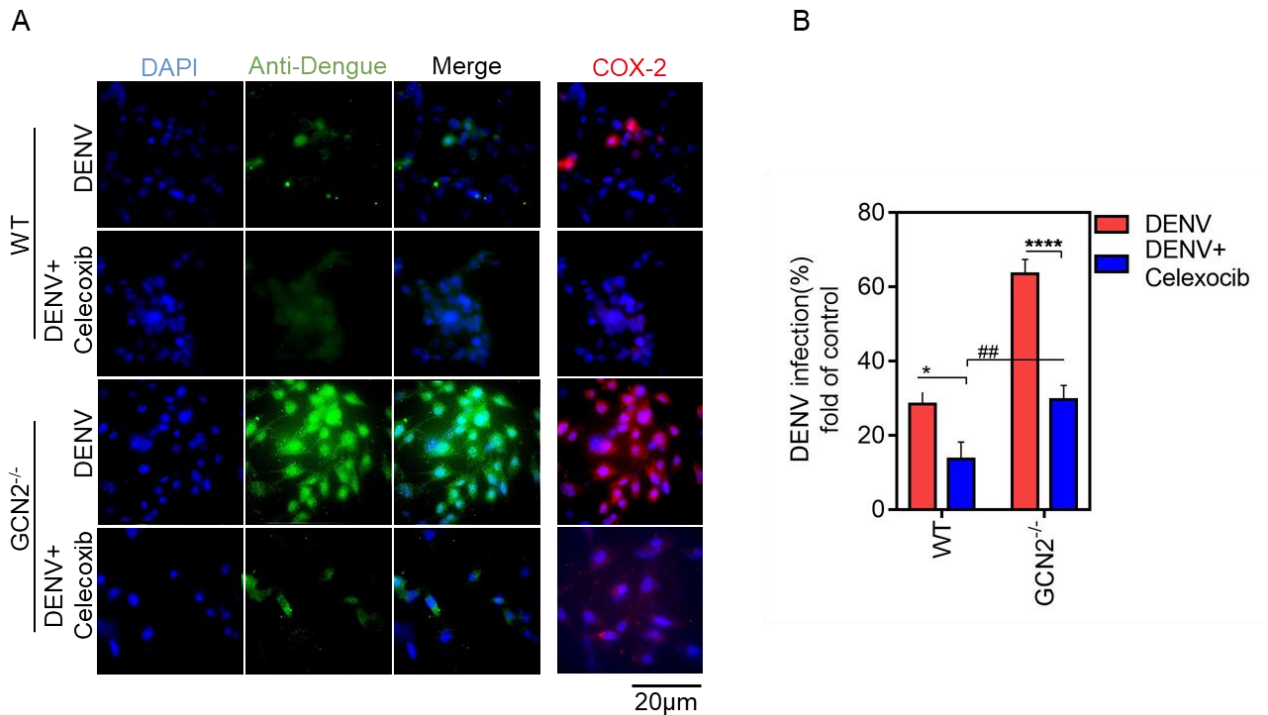

**Figure S3. GCN2 shows anti-viral activity against DENV by limiting COX-2 production.** (A) WT and GCN2<sup>-/-</sup> MEFs were mock infected or infected with DENV-2 (moi 5) for 36h with or without COX-2 inhibitor Celecoxib (10µM) for analysis of DENV pathogenesis. Immunofluorescence image is representative of one of 3 independent experiments. (B) Quantification of no. of DENV-2 infected cells using Image J software. Data is mean ± SEM of three independent experiments. \*P< 0.05, \*\*\*P<0.001, ## P<0.01 was considered significant. Statistical analysis was done using two-tailed unpaired Student's *t* test.

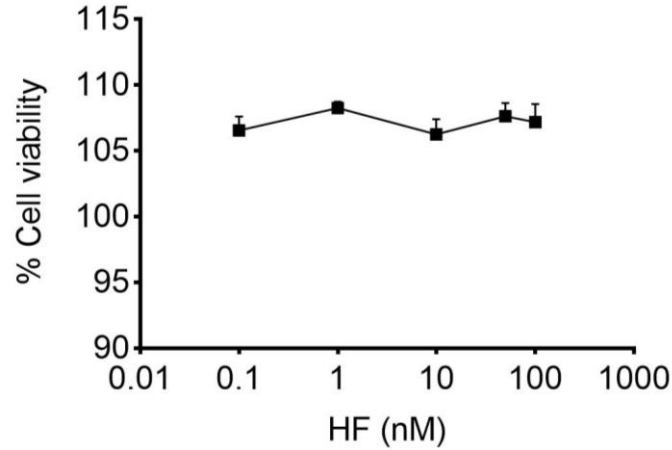

**Figure S4. HF is not toxic to HepG2 cells at concentrations up to 100nM.** HepG2 cells were treated with different concentrations of HF for 48h. Cell cytotoxicity of HF was assessed by MTT assay. Data is from two independent experiments.

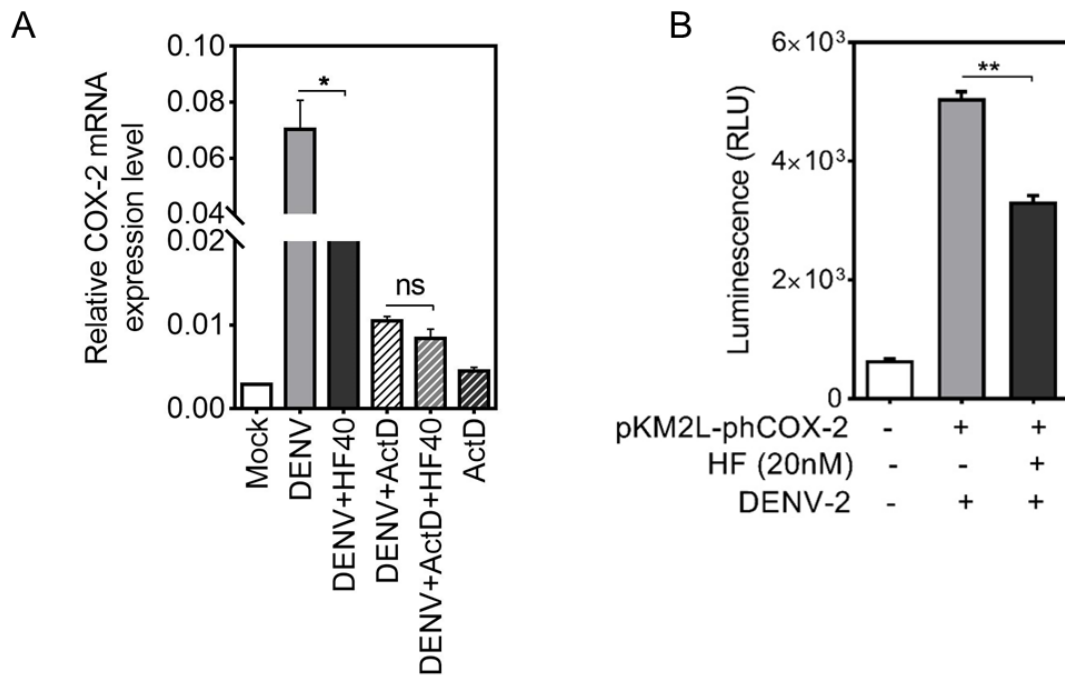

**Figure S5. GCN2 regulates DENV induced COX-2 mRNA expression at transcriptional level.** (A) HepG2 cells were infected with DENV-2 (moi 3) for 36h followed by Actinomycin D (ActD, 10 $\mu$ g/ml) treatment for 2h. Post ActD treatment, HF (40nM) was given for 3h. COX-2 mRNA levels was quantified through qRT-PCR. Graph represents data as mean  $\pm$  SEM from three independent experiments. \*P < 0.05 was considered significant. Statistical significance was calculated by two-tailed unpaired Student's t-test. (B) Renilla luminescence levels in HepG2 cells transfected with a luciferase reporter plasmid containing human COX-2

promoter (pKM2L-phCOX-2) for 36h followed by DENV-2 (moi 3) for further 24h. HF treatment was given in the last three hours of infection. Graph represents data as mean  $\pm$  SEM from three independent experiments. \*\*P<0.01 was considered significant. Statistical significance was calculated by two-tailed unpaired Student's t-test.

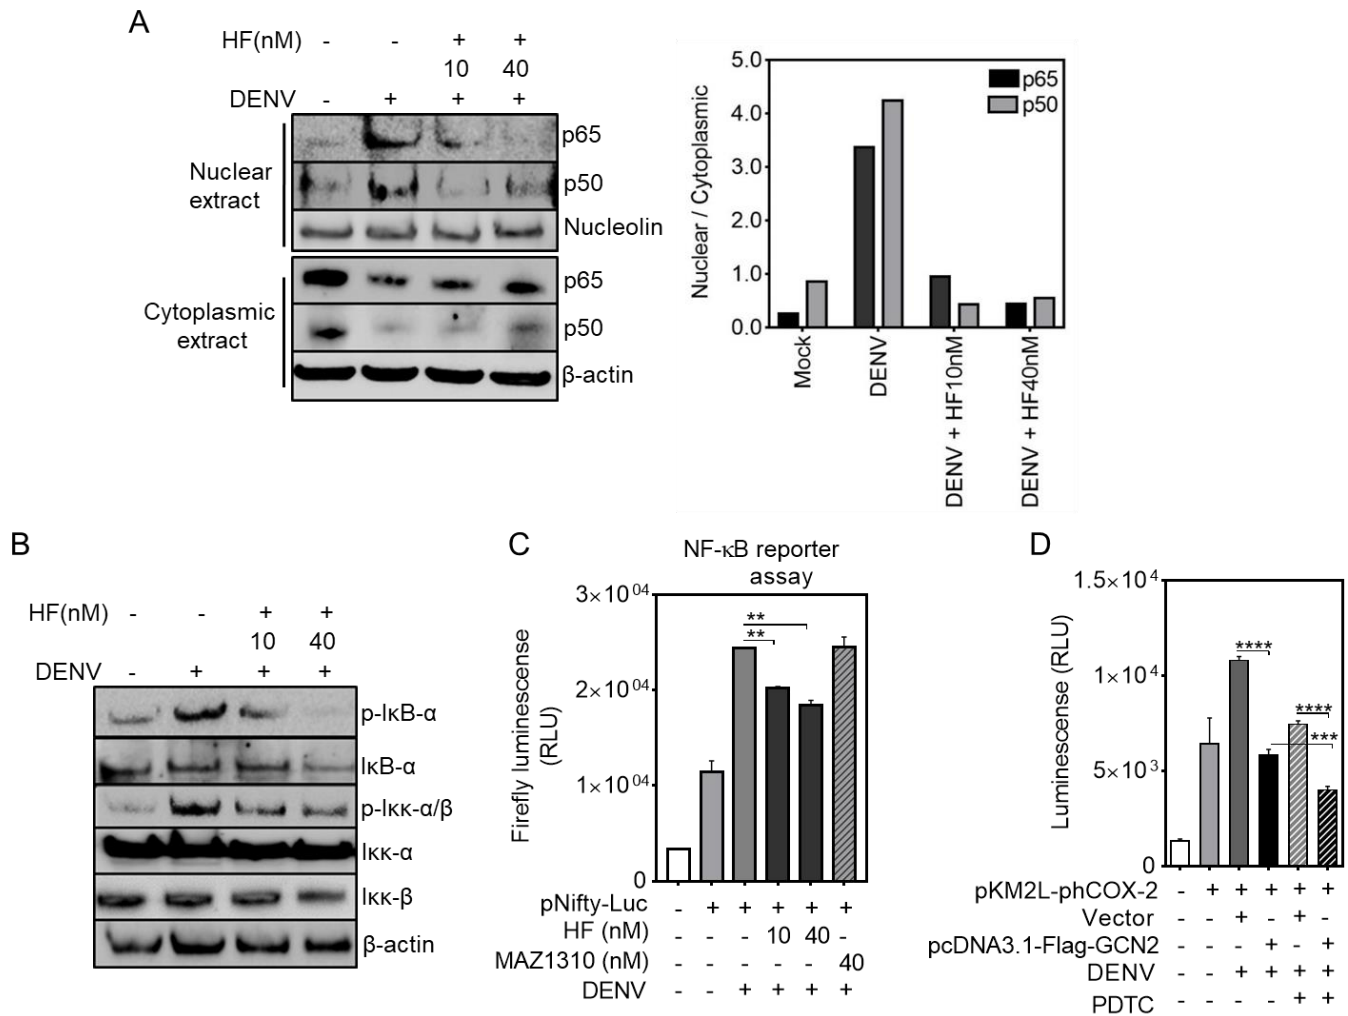

**Figure S6. DENV induced NF-κβ signaling is dampened under GCN2 activation conditions.** (A) Immunoblot and densitometric analysis of p65 and p50 accumulation in nuclear and cytoplasmic fraction of HepG2 cells infected with DENV-2 (moi 3) followed by treatment with different doses of HF. Blot represents data from one out of N=3 independent experiments. (B) Immunoblot analysis of p-IKB-α, IKB-α, p-IKK-α/β, IKK-α, IKK-β expression in HepG2 cells infected with DENV-2 (moi 3) followed by treatment with different doses of HF. Blot represents data from one out of three independent experiments. (C) Firefly luminescence levels in HepG2 cells transfected with NF-κβ responsive plasmid

(pNifty-Luc) for 36h followed by DENV-2 (moi 3) infection for further 24h. HF or its inactive derivative MAZ1310 treatment was given in the last three hours of infection. **(D)** Renilla luminescence levels in HepG2 cells co-transfected with a luciferase reporter plasmid containing human COX-2 promoter (pKM2L-phCOX-2) and pcDNA3.1-Flag-GCN2 plasmid or vector control for 36h. The transfected cells were further treated with or without PDTC (50 $\mu$ M) for 2h prior to DENV-2 (moi 3) infection for further 24h. PDTC (50 $\mu$ M) treatment was maintained for the infection duration. Graphs in (C) and (D) represent data as mean  $\pm$  SEM from two independent experiments, each with three replicates. \*\*P<0.01, \*\*\*P<0.001, \*\*\*\*P<0.001 was considered significant. Statistical analysis was done using two-tailed unpaired Student's *t* test.

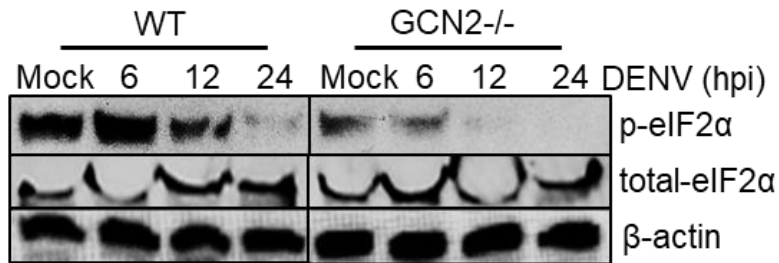

**Figure S7. DENV inhibits eIF2 $\alpha$  phosphorylation.** WT or GCN2<sup>-/-</sup> MEFs were mock infected or infected with DENV-2 at moi=3 and lysates were prepared at 6, 12 and 24 hours post infection (hpi). Immunoblot analysis of eIF2- $\alpha$  phosphorylation in the cell lysates.  $\beta$ -actin was used as loading control.
